# Supplementary material for: Association between DSCAM polymorphisms and non-syndromic Hirschsprung disease in Chinese population
Source: Springer Nature journal article supplement (doi:10.1186/s12881-018-0637-2), 2018-07-13
Supplement: MOESM1 [file 15952584]

**Supplementary Table 1. The subclinical information collected for the subjects in this study.**

| HCSR subphenotype          | Cases (n=1470) |        | %      | Controls (n=1473) | %      |
|----------------------------|----------------|--------|--------|-------------------|--------|
| Subjects                   |                |        |        |                   |        |
| Age range ( Months )       | 8.37±20.50     |        |        | 18.61±19.75       |        |
| ≤2                         | 725            |        | 49.32% | 458               | 31.09% |
| >2                         | 745            |        | 50.68% | 1015              | 68.91% |
| Clinical manifestation     | DS             | Non-DS |        |                   |        |
| S-HCSR                     | 4              | 1029   | 70.27% |                   |        |
| L-HCSR                     | 1              | 293    | 20.00% |                   |        |
| TCA                        | 0              | 82     | 5.58%  |                   |        |
| Total intestine            | 0              | 3      | 0.20%  |                   |        |
| Enteritis_before_operation |                | 261    | 17.76% |                   |        |
| Enteritis_after_operation  |                | 249    | 16.94% |                   |        |
