# Supplementary material for: Association between DSCAM polymorphisms and non-syndromic Hirschsprung disease in Chinese population
Source: Springer Nature journal article supplement (doi:10.1186/s12881-018-0637-2), 2018-07-13
Supplement: MOESM3 [file 15952584]

**Supplementary Table 2. The Case-only subclinical association analysis.**

| CHR                        | SNP       | BP       | A1/A2 | F_A  | F_U  | P    | OR( CI 0.95)    |
|----------------------------|-----------|----------|-------|------|------|------|-----------------|
| Enteritis before operation |           |          |       |      |      |      |                 |
| 21                         | rs2837770 | 40662426 | G/A   | 0.57 | 0.59 | 0.37 | 0.90(0.73~1.13) |
| 21                         | rs8134673 | 40676385 | G/A   | 0.56 | 0.58 | 0.39 | 0.91(0.73~1.13) |
| Enteritis after operation  |           |          |       |      |      |      |                 |
| 21                         | rs2837770 | 40662426 | G/A   | 0.53 | 0.59 | 0.04 | 0.80(0.64~0.99) |
| 21                         | rs8134673 | 40676385 | G/A   | 0.54 | 0.58 | 0.13 | 0.84(0.68~1.05) |
| Gender                     |           |          |       |      |      |      |                 |
| 21                         | rs2837770 | 40662426 | G/A   | 0.58 | 0.58 | 0.88 | 0.99(0.81~1.20) |
| 21                         | rs8134673 | 40676385 | G/A   | 0.57 | 0.57 | 0.74 | 0.97(0.79~1.18) |

CHR : chromosome; SNP: single nucleotide polymorphism; BP: base pair; A1/A2: minor/major allele of the polymorphism; F\_A/F\_U: Minor allele frequency of the affected/unaffected subjects; OR: Odds Ratio; CI: Confidence of interval.
