# Supplementary material for: Association between DSCAM polymorphisms and non-syndromic Hirschsprung disease in Chinese population
Source: Springer Nature journal article supplement (doi:10.1186/s12881-018-0637-2), 2018-07-13

**Supplementary Figure 2.** The expression of DSCAM in the intestinal mucosa of (A) a non-HSCR subject. (B) dilated (ganglionic) segment and (C) narrow (aganglionic) segment of a HSCR patient.

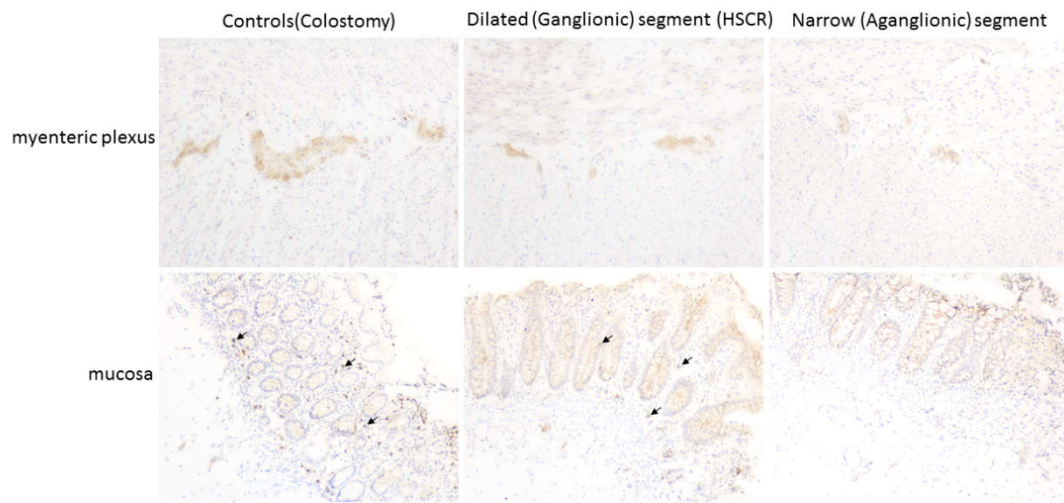

Supplement: MOESM4 [file 15952584]
