# Supplementary material for: Association between DSCAM polymorphisms and non-syndromic Hirschsprung disease in Chinese population
Source: Springer Nature journal article supplement (doi:10.1186/s12881-018-0637-2), 2018-07-13

**Supplementary Figure 3.** DSCAM shows strong connection with PAK1 analyzed by GeneMania.

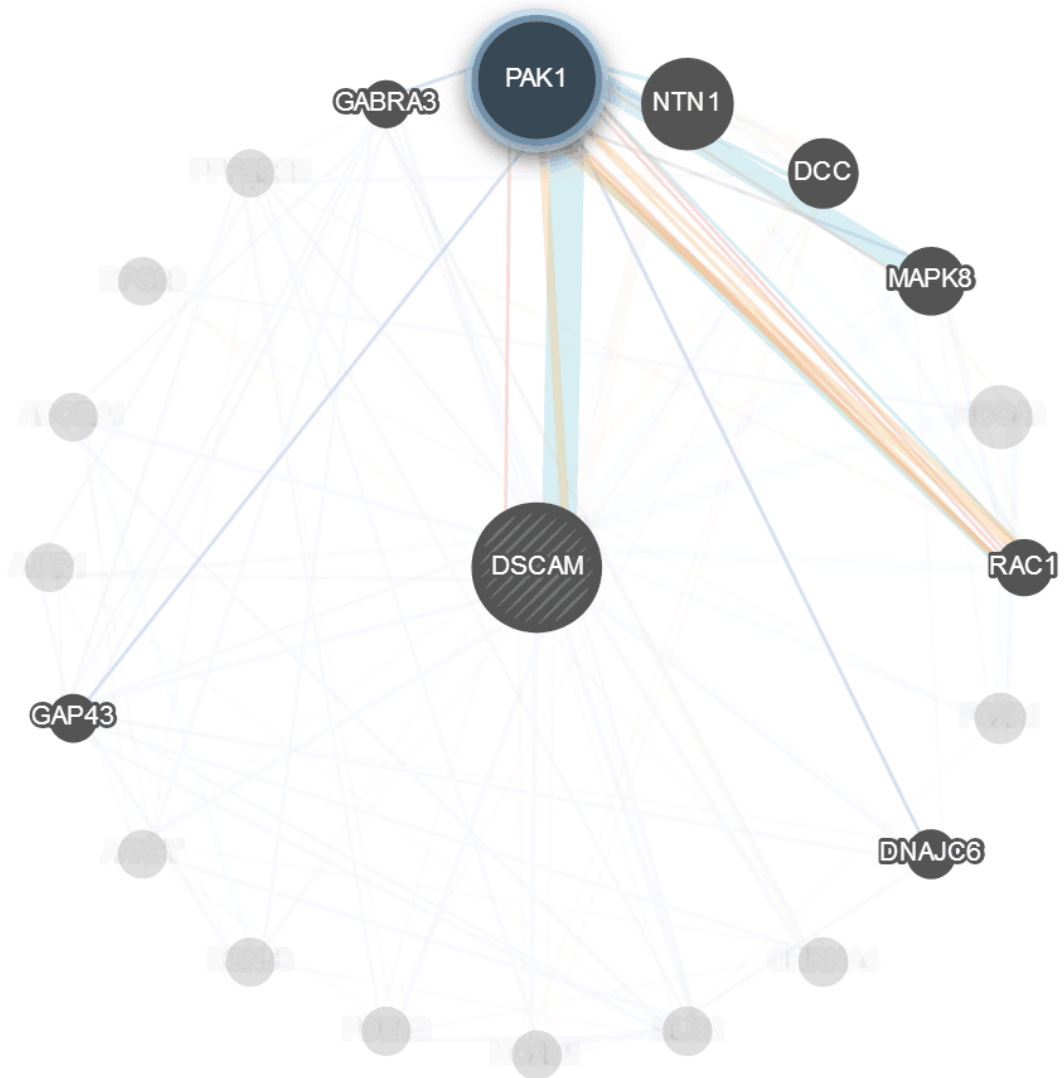

Supplement: MOESM5 [file 15952584]
